# Supplementary material for: Cholesterol Content of Very-Low-Density Lipoproteins Is Associated with 1-Year Mortality in Acute Heart Failure Patients
Source: MDPI journal article supplement (doi:10.3390/biom12101542), 2022-10-21
Supplement: s1 [file s1]

**Table S3. Correlation analyses of VLDL-apoB with laboratory and clinical parameters**

|                   | VLDL-apoB |                  |     |
|-------------------|-----------|------------------|-----|
|                   | r         | p                | N   |
| Protein (g/L)     | 0.02      | 0.707            | 303 |
| Albumin (g/L)     | 0.03      | 0.583            | 303 |
| Fibrinogen (g/L)  | 0.25      | <b>&lt;0.001</b> | 289 |
| BUN (mmol/L)      | 0.06      | 0.274            | 313 |
| eGFR              | -0.06     | 0.252            | 314 |
| CK (U/L)          | 0.05      | 0.339            | 314 |
| NT-proBNP (pg/mL) | -0.01     | 0.901            | 314 |
| CRP (mg/L)        | 0.10      | 0.082            | 314 |
| IL-6 (pg/mL)      | 0.08      | 0.140            | 314 |
| Hemoglobin (g/L)  | 0.05      | 0.355            | 314 |
| MAP (mm Hg)       | 0.06      | 0.283            | 314 |

Data presented are the Spearman correlation coefficient *r*, the corresponding *p*-values, and the number of available samples (*N*).

*P*-values < 0.05 are considered significant and are depicted in bold.

BUN, blood urea nitrogen; CK, creatin kinase; CRP, C-reactive protein; eGFR, estimated glomerular filtration rate; IL-6, interleukin-6; MAP, mean arterial pressure; NT-proBNP, N-terminal pro brain natriuretic peptide.
