# Supplementary figures and images for: Cholesterol Content of Very-Low-Density Lipoproteins Is Associated with 1-Year Mortality in Acute Heart Failure Patients
Source: MDPI journal article supplement (doi:10.3390/biom12101542), 2022-10-21

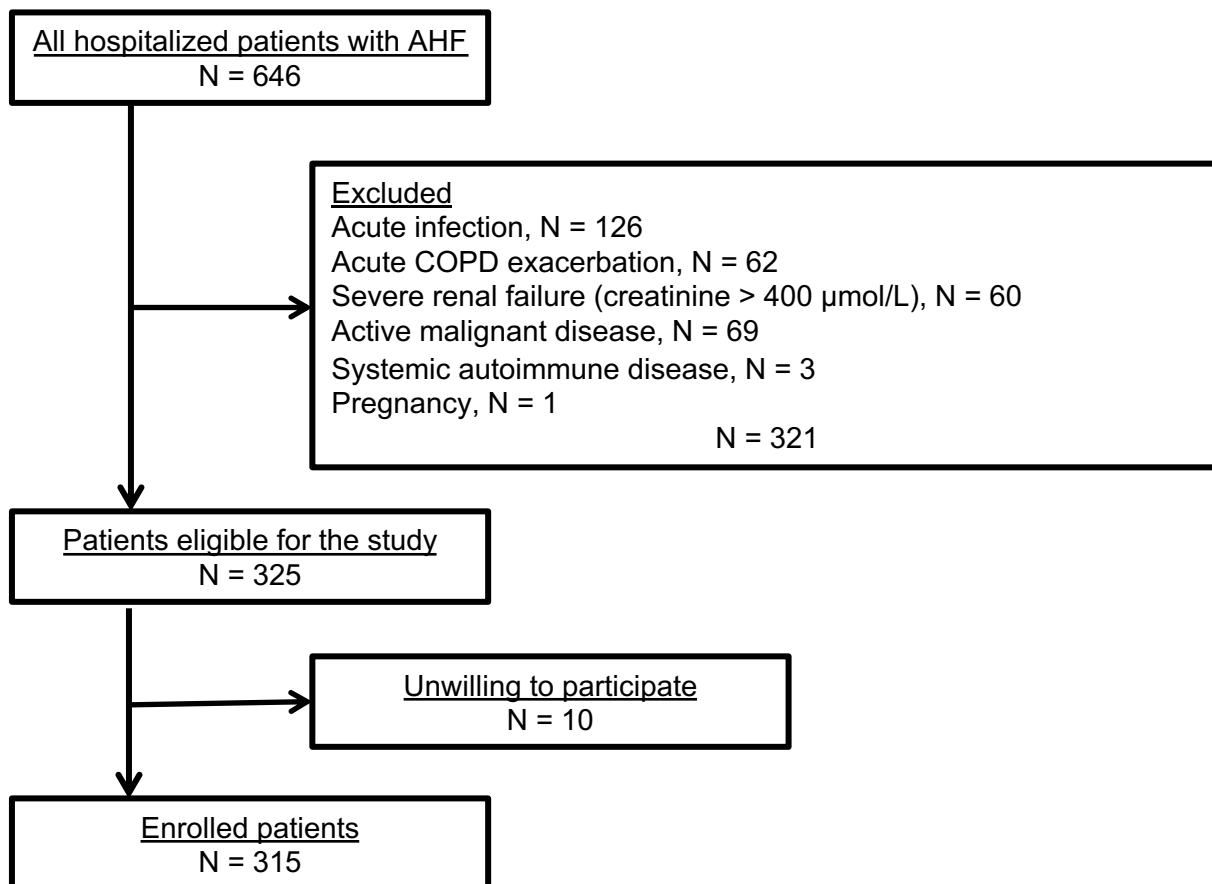

Supplement: s1 [file s1]
